# Supplementary material for: Structural characterisation of the catalytic domain of botulinum neurotoxin X - high activity and unique substrate specificity
Source: PubMed Central journal article supplement (PMC5851995; doi:10.1038/s41598-018-22842-4), 2018-03-14
Supplement: 41598_2018_22842_MOESM1_ESM.pdf [file 41598_2018_22842_MOESM1_ESM.pdf]

**Structural characterisation of the catalytic domain of botulinum neurotoxin X - high activity and unique substrate specificity**

Geoffrey Masuyer, Sicai Zhang, Sulyman Barkho, Yi Shen, Linda Henriksson, Sara Kosenina, Min Dong and Pål Stenmark

**Supplementary information:**

## Supplementary Figure S1: Sequence alignment of LC/X with other VAMP-cleaving LCs

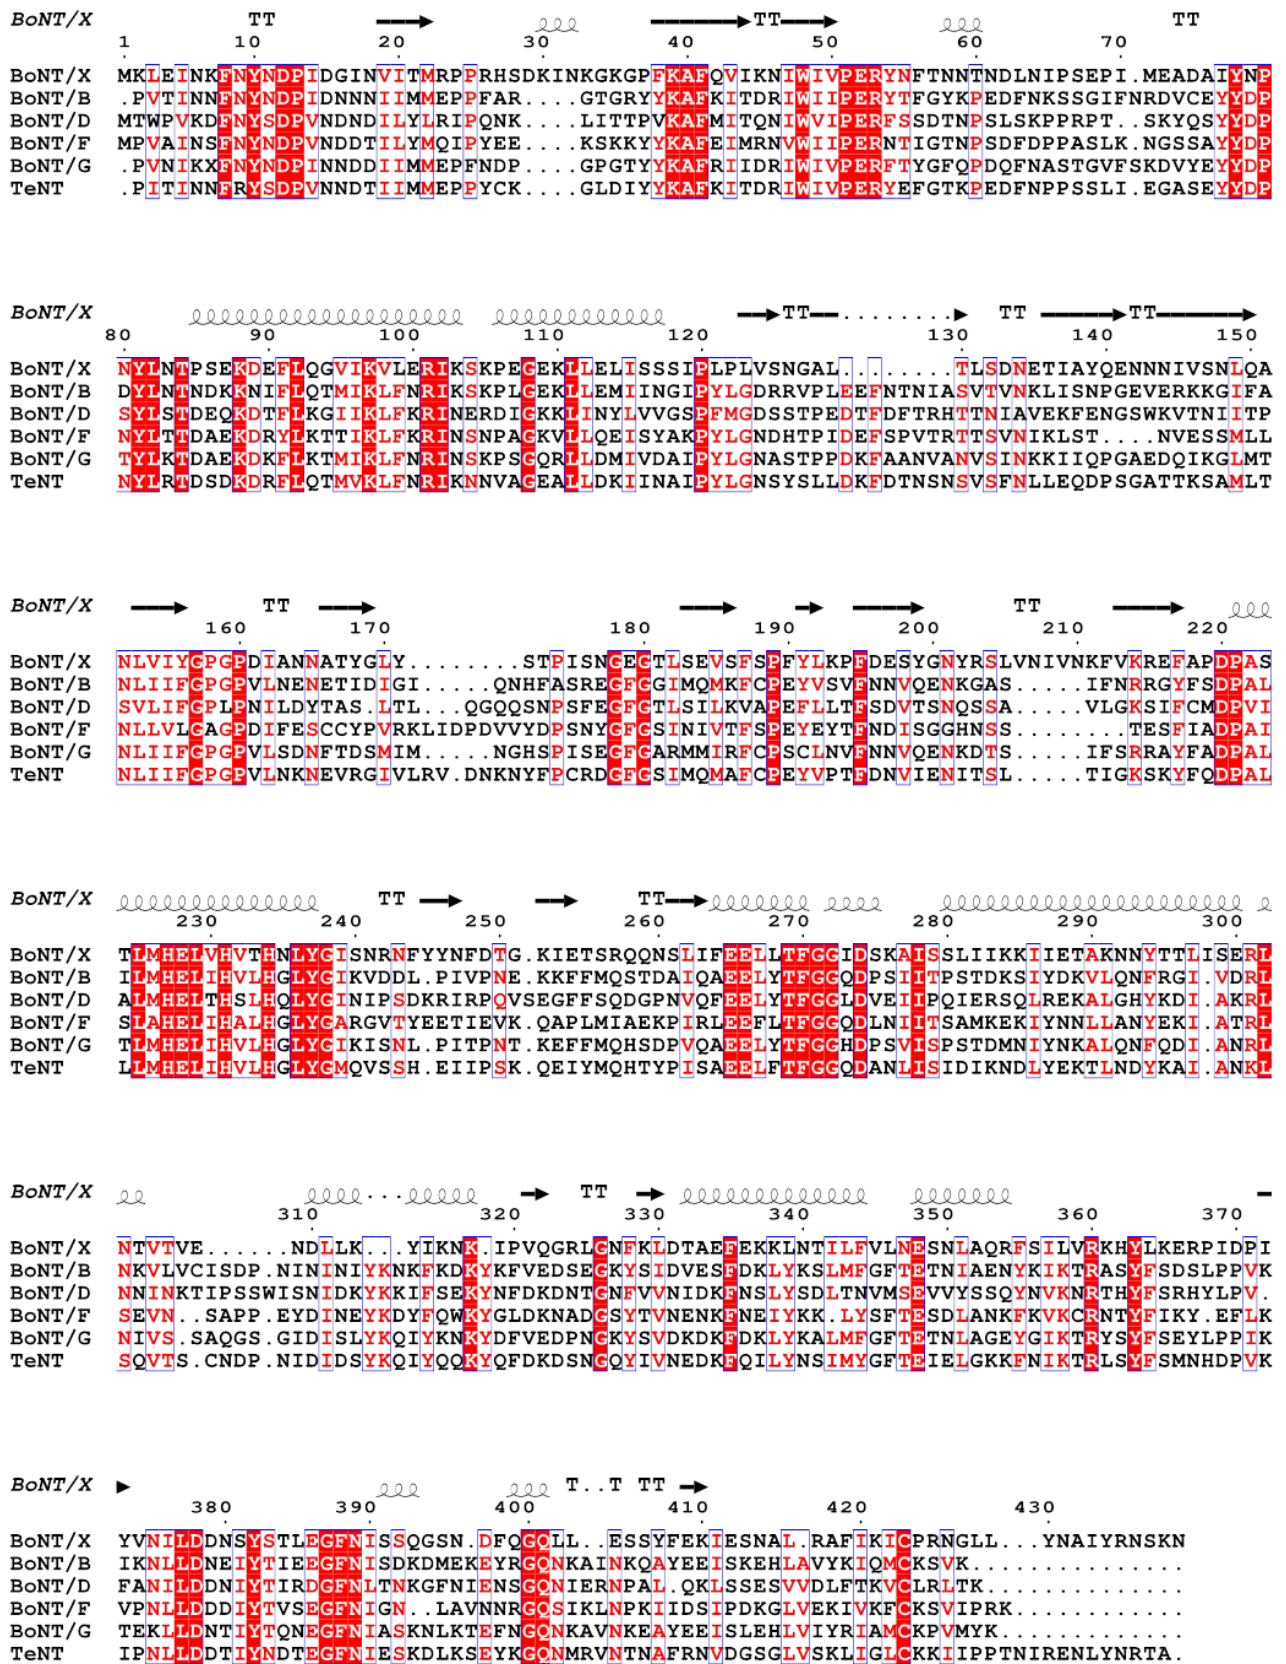

## Supplementary Figure S2: Loop 250: Comparison of the loop between LCs

Ribbon representation of LC/X (Red), compared to the LC of serotypes A (cyan, PDB 3BON), B (sand, PDB 1EPW), D (yellow, PDB 2FPQ), F (gold, PDB 2A97), and Te (light orange, PDB 1Z7H). The zinc ion is shown as a grey sphere.

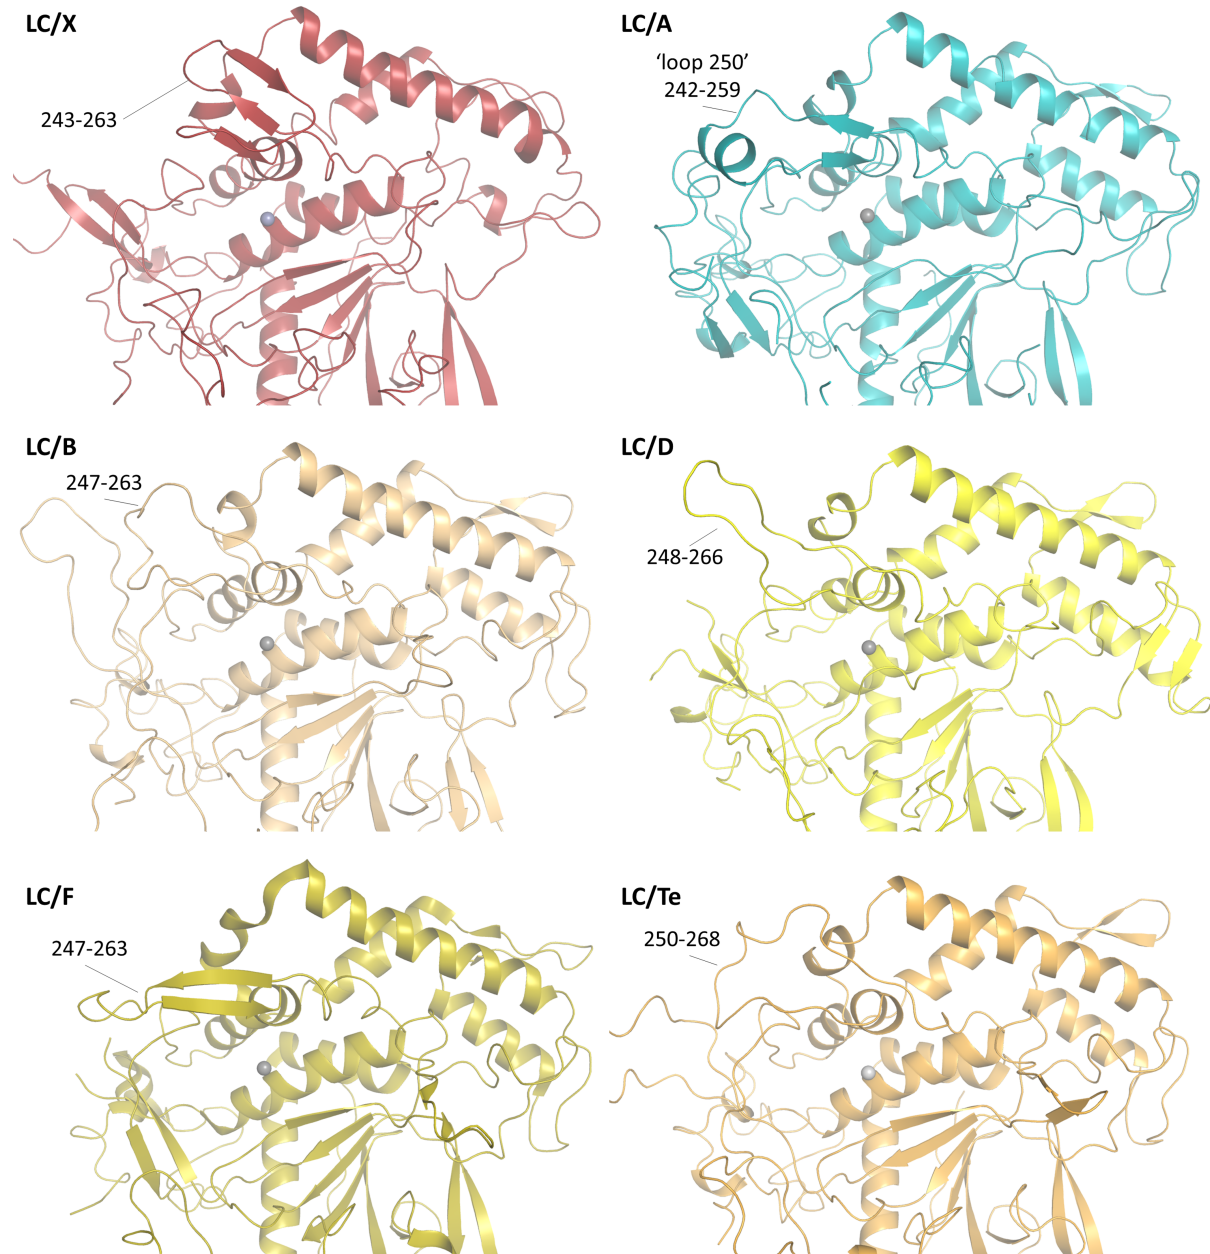

### Supplementary Figure S3: Catalytic site: conserved $Zn^{2+}$ coordination

LC/X (Red) was superposed with the LC of serotypes A, (cyan, PDB 3BON), B (sand, PDB 1EPW), D (yellow, PDB 2FPQ), F (gold, PDB 2A97), and Te (light orange, PDB 1Z7H). The zinc ion is shown as a grey sphere and the zinc-coordinating residues as sticks.

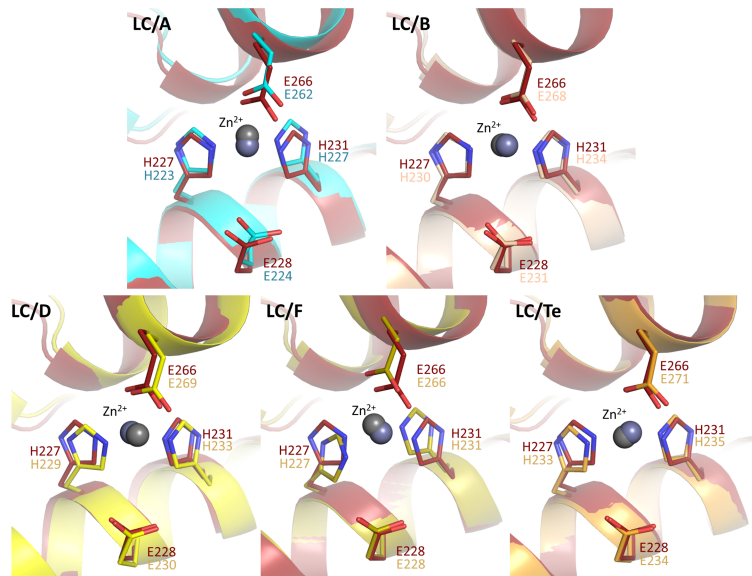

**Supplementary Figure S4: LC/X cleavage sites on its VAMP substrates.**  
Cleavage site is highlighted in red.

```
VAMP1  35 . QQTQAQVEEVVDIIRVNVDKVLERDQKLSSELDDRADALQAGASQFESSAAKLKR .88
VAMP2  33 . QQTQAQVDEVVDIMRVNVDKVLERDQKLSSELDDRADALQAGASQFETSAAKLKR .86
VAMP3  20 . QQTQNQVDEVVDIMRVNVDKVLERDQKLSSELDDRADALQAGASQFETSAAKLKR .73
VAMP4  54 . KHVQNQVDEVIDVMQENITKVIERGERLDELQDKSESLSDNATAFSNRSKQLRR .107
VAMP5   7 . ERCQQQANEVTEIMRNNFGKVLERGKLAELQQRSDQLLDMSSTFNKTTQNLAQ .60
Ykt6  140 . TKVQAELDETKIILHNTMESLLERGEKLDLVSKEVLGTQSKAFYKTAR---- .189
```

**Supplementary Table S1: Exponential fit parameters (see Fig. 6A)**

|             | <b>A</b> | <b>k (min<sup>-1</sup>)</b> | <b>C</b> | <b>R<sup>2</sup></b> |
|-------------|----------|-----------------------------|----------|----------------------|
| <b>LC/X</b> | 0.19     | 0.07                        | 0.11     | 0.95                 |
| <b>LC/B</b> | 0.15     | 0.02                        | 0.14     | 0.94                 |
